# Supplementary material for: The predation relationship between online medical search and online medical consultation—empirical research based on Baidu platform data
Source: Frontiers journal article supplement (doi:10.3389/fpubh.2024.1392743), 2024-08-29
Supplement: Data_Sheet_1.ZIP [file Data_Sheet_1.ZIP]

## Sheet: Sheet1
时间	问诊	搜索
11.26	37700	552738
11.27	40925	585466
11.28	56480	619676
11.29	72885	644593
11.30	64526	638569
12.01	58621	580123
12.02	58800	577281
12.03	55987	618107
12.04	62275	672525
12.05	75349	855273
12.06	76055	953011
12.07	81291	993121
12.08	101740	1139297
12.09	110729	1231211
12.10	123343	1356455
12.11	154431	1613902
12.12	217343	2329687
12.13	299551	3060363
12.14	513692	4109554
12.15	788833	5218570
12.16	913291	6034926
12.17	1060125	7058905
12.18	1222258	8119639
12.19	1378142	8813603
12.20	1493190	9443860
12.21	1513273	9387796
12.22	1478896	8760797
12.23	1373771	7975180
12.24	1246297	7042073
12.25	1120611	5978086
12.26	1010725	5102073
12.27	882565	4255799
12.28	756992	3455125
12.29	657167	2851090
12.30	571074	2374717
12.31	496735	1987953
01.01	427859	1655646
01.02	400855	1539335
01.03	385311	1367634
01.04	338808	1227389
01.05	341589	1105786
01.06	335324	1024402
01.07	306303	933724
01.08	273980	827701
01.09	266121	758473
01.10	245053	701766
01.11	191701	639127
01.12	221173	593683
01.13	202681	527829
01.14	170485	456436
01.15	160700	418536
01.16	150283	396633
01.17	142069	356473
01.18	134023	328306
01.19	118988	302935
01.20	101215	259794
01.21	65415	188074
01.22	73132	197008
01.23	80113	204234
01.24	82129	200720
01.25	89729	206994
